# Supplementary material for: Geographically extensive larval surveys reveal an unexpected scarcity of primary vector mosquitoes in a region of persistent malaria transmission in western Zambia
Source: PubMed Central journal article supplement (PMC7849156; doi:10.1186/s13071-020-04540-1), 2021-02-01
Supplement: 13071_2020_4540_MOESM1_ESM.pdf [file 13071_2020_4540_MOESM1_ESM.pdf]

## Additional File 1

**Table S1: Unknown *Anopheles* species: cytochrome *c* oxidase 1 (COI) sequences.** Specimens whose COI sequences did not match published sequences with  $\geq 95\%$  identity (on National Center for Biotechnology Information nucleotide database), but whose closest alignments were to *Anopheles* species, were designated “unknown *Anopheles* species”. This table provides a breakdown of the species that these sequences aligned with at identity levels below that accepted to represent within-species variation.

| Species category                   | Description (incl. refs if appropriate)                                                                                                                                                                                               | Number of haplotypes (individuals); proportion |
|------------------------------------|---------------------------------------------------------------------------------------------------------------------------------------------------------------------------------------------------------------------------------------|------------------------------------------------|
| Sympatric species (<95% identity)  | Anopheline species known to occur in the Afrotropical region<br><i>An. species 1</i> [1, 2];<br><i>An. species 7</i> [3];<br><i>An. coustani</i> group (see designation in text);<br><i>An. gambiae</i> s.l.;<br><i>An. squamosus</i> | 21 (22); 13%                                   |
| Allopatric species (<95% identity) | Anopheline species <i>not</i> known to occur in Afrotropical region                                                                                                                                                                   | 30 (114); 70%                                  |
| Allopatric and sympatric species   | Equal similarity (<95%) to both species categories                                                                                                                                                                                    | 20 (27); 17%                                   |

**Table S2: Unknown *Anopheles* species: second Internal Transcribed Spacer (ITS2) region sequences.** Specimens whose ITS2 sequences did not match published sequences with  $\geq 95\%$  identity (on National Center for Biotechnology Information nucleotide database), but whose closest alignments were to *Anopheles* species, were designated “unknown *Anopheles* species”. This table provides a breakdown of the species that these sequences aligned with at identity levels below that accepted to represent within-species variation.

| Species category                    | Description (incl. refs if appropriate)                                                                 |                                                                                                                                                                                                                            | Number individuals; proportion |
|-------------------------------------|---------------------------------------------------------------------------------------------------------|----------------------------------------------------------------------------------------------------------------------------------------------------------------------------------------------------------------------------|--------------------------------|
| Sympatric species (>95% identity)   | Above-threshold match to anopheline species known to occur in Afrotropical region, without COI sequence | <i>An. pharoensis</i> ;<br><i>An. species 16</i> [3]                                                                                                                                                                       | 3; 6%                          |
| Sympatric species (90-95% identity) | Anopheline species known to occur in the Afrotropical region                                            | <i>An. c.f. coustani</i> 1 [4];<br><i>An. pharoensis</i> ;<br><i>An. species 16</i> [3]                                                                                                                                    | 10; 19%                        |
| Sympatric species (<90% identity)   | Anopheline species known to occur in the Afrotropical region                                            | <i>An. coustani</i> s.s.;<br><i>An. mascarensis</i> ;<br><i>An. moucheti</i> ;<br><i>An. species 6</i> [3];<br><i>An. species 7</i> [3];<br><i>An. species 9</i> [3];<br><i>An. species 11</i> [3];<br><i>An. theileri</i> | 37; 71%                        |
| Allopatric species (<95% identity)  | Anopheline species <i>not</i> known to occur in Afrotropical region                                     |                                                                                                                                                                                                                            | 2; 4%                          |

## References

1. Bandibabone J, Muhigwa JB, Agramonte NM, Zawadi B, Ombeni L, Corredor-Medina C, et al. Identification of *Anopheles* species in Sud Kivu, Democratic Republic of Congo, using molecular tools. *Trans R Soc Trop Med Hyg.* 2018;112:405-7; doi: 10.1093/trstmh/try069.
2. Lemma W, Alemu K, Birhanie M, Worku L, Niedbalski J, McDowell MA, et al. *Anopheles cinereus* implicated as a vector of malaria transmission in the highlands of north-west Ethiopia. *Parasit Vectors.* 2019;12:557; doi: 10.1186/s13071-019-3797-9.
3. St Laurent B, Cooke M, Krishnankutty SM, Asih P, Mueller JD, Kahindi S, et al. Molecular characterization reveals diverse and unknown malaria vectors in the western Kenyan highlands. *Am J Trop Med Hyg.* 2016;94:327-35; doi: 10.4269/ajtmh.15-0562.
4. Lobo NF, St Laurent B, Sikaala CH, Hamainza B, Chanda J, Chinula D, et al. Unexpected diversity of *Anopheles* species in eastern Zambia: implications for evaluating vector behavior and interventions using molecular tools. *Sci Rep-Uk.* 2015;5; doi: 10.1038/srep17952.
